# Supplementary material
Source: PubMed Central journal article supplement (PMC122623)

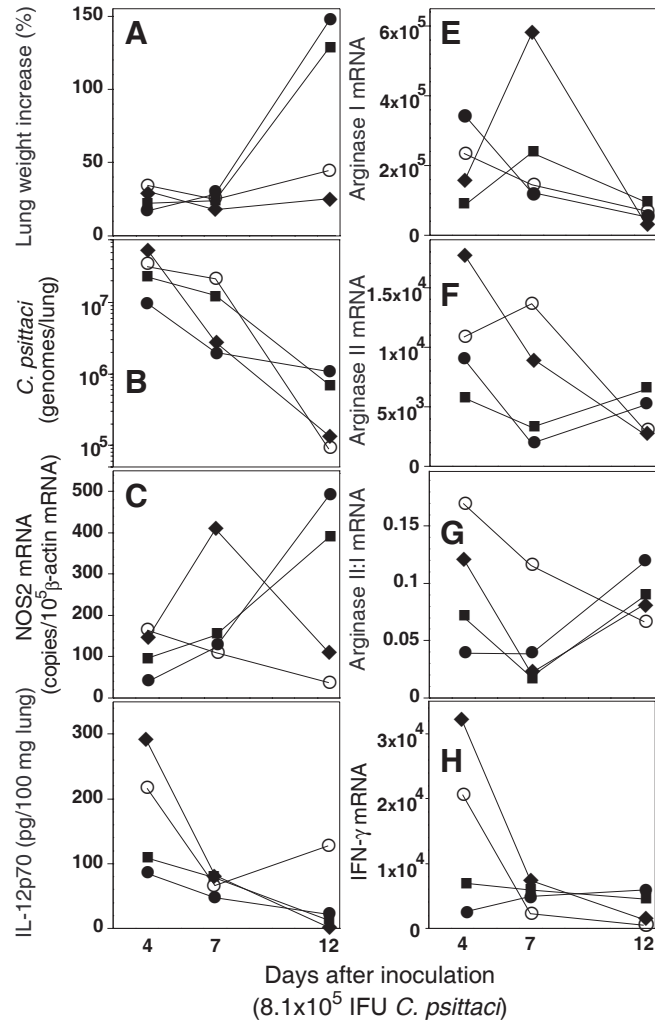

Supplement: pnas_99_6_3914__3.pdf [file pnas_99_6_3914__3.pdf]
